# Supplementary material
Source: PubMed Central journal article supplement (PMC6561186)
Supplement: pnas.1904709116.sapp.pdf [file pnas.1904709116.sapp.pdf]

# PNAS

[www.pnas.org](http://www.pnas.org)

Supplementary Information (SI) for:

**On the cause of sleep: protein fragments,  
the concept of sentinels, and links to epilepsy**

Alexander Varshavsky

Division of Biology and Biological Engineering, California Institute of Technology,  
Pasadena, CA 91125

Email: [avarsh@caltech.edu](mailto:avarsh@caltech.edu)

Second revision, April 1, 2019

**This PDF includes:**

Figures S1-S6 and their legends.

References for SI.

**A** Calpain-generated natural C-terminal (Ct) fragments that are either identified or predicted substrates of the Arg/N-degrogen pathway

| Ct-fragment                  | cleavage site            | Ct-fragment                  | cleavage site            | Ct-fragment                  | cleavage site            |
|------------------------------|--------------------------|------------------------------|--------------------------|------------------------------|--------------------------|
| <i>Asp-Bcl</i> XL <b>1</b>   | 56 SWHLA↓DSPA...K 233    | <i>Asp-Capns</i> 1 <b>2</b>  | 138 DGFGI↓DTCR...S 269   | <i>Glu-Bak</i> <b>3</b>      | 11 KVGCD↓ESPS...S 208    |
| <i>Glu-Ik</i> Bα <b>4</b>    | 46 VKELR↓EIRL...L 314    | <i>Arg-Bid</i> <b>5</b>      | 66 SFNQG↓RIEP...D 195    | <i>Arg-cFos</i> <b>6</b>     | 86 APSQT↓RAPH...L 380    |
| <i>Arg-Igfbp</i> 2 <b>7</b>  | 176 VNEQH↓RQMG...Q 305   | <i>Arg-Atp2b</i> 2 <b>8</b>  | 1086 FRGLN↓RIQT...L 1198 | <i>Arg-Ankrd</i> 2 <b>9</b>  | 98 SLDLR↓REII...Q 358    |
| <i>Lys-Ica</i> 512 <b>10</b> | 604 SRQRD↓KERL...Q 979   | <i>Tyr-Grm</i> 1 <b>11</b>   | 932 PLTKS↓YQGS...L 1199  | <i>Leu-Capn</i> 1 <b>12</b>  | 23 DKELG↓LGRH...A 713    |
| <i>Phe-Glu</i> N2a <b>13</b> | 1274 NNALQ↓FQKN...V 1464 | <i>Asn-Dscr</i> 1 <b>14</b>  | 2 HFRNF↓NYSF...S 197     | <i>Asn-Ca</i> v1.1 <b>15</b> | 1660 NTNNA↓NANV...E 1880 |
| <i>Asn-Bfl</i> -1 <b>16</b>  | 67 ARIIF↓NQVM...K 172    | <i>Gln-Ryr</i> 1 <b>17</b>   | 1397 VAMMT↓QPPS...S 5035 | <i>Gln-Tln</i> 1 <b>18</b>   | 429 STVLQ↓QQYN...H 2541  |
| <i>Gln-Egfr</i> <b>19</b>    | 681 LRRLL↓QERE...A 1210  | <i>Gln-Prk</i> Cβ <b>20</b>  | 307 RAKIG↓QGTK...S 673   | <i>Arg-Dmd</i> <b>21</b>     | 688 TMVTT↓REQI...M 3678  |
| <i>Arg-Mef</i> 2d <b>22</b>  | 74 EPHES↓RTNA...K 514    | <i>Arg-p39</i> <b>23</b>     | 104 LLRKG↓RDGP...R 369   | <i>Arg-Casp</i> 9 <b>24</b>  | 111 LRPEI↓RKPE...S 416   |
| <i>Arg-Gly</i> T1A <b>25</b> | 22 DQNL↓RGNW...I 633     | <i>Lys-Ppp</i> 3ca <b>26</b> | 388 TAAAR↓KEVI...Q 521   | <i>Lys-Prk</i> Cα <b>27</b>  | 320 PSEDR↓KQPS...V 672   |
| <i>Lys-Cttn</i> <b>28</b>    | 354 FENLA↓KERE...Q 546   | <i>Leu-Nf</i> 2 <b>29</b>    | 294 KLILQ↓LCIG...L 596   | <i>Leu-Tnnt</i> 2 <b>30</b>  | 77 PKPSR↓LFMP...K 301    |
| <i>Leu-Rad</i> 21 <b>31</b>  | 188 ASNLL↓LEPE...I 635   | <i>Leu-Ptp</i> 5 <b>32</b>   | 220 GSNVS↓LTLD...E 541   | <i>Leu-Vim</i> <b>33</b>     | 260 VSKPD↓LTAA...E 466   |
| <i>Leu-Ctnnb</i> <b>34</b>   | 26 QQQSY↓LDSG...L 781    | <i>Leu-Camk</i> 4 <b>35</b>  | 19 ASTEN↓LVPD...Y 469    | <i>Phe-Prk</i> Cγ <b>36</b>  | 334 SKRCF↓FGAS...M 697   |

**B** Calpain-generated natural Ct-fragments whose Nt-residues are not recognized by the Arg/N-degrogen pathway

|                              |                         |                             |                        |                             |                        |
|------------------------------|-------------------------|-----------------------------|------------------------|-----------------------------|------------------------|
| <i>Ala-Pde</i> 1a2 <b>37</b> | 122 VHAVG↓AGIF...P 545  | <i>Ser-Copb</i> 1 <b>38</b> | 524 QSALS↓SSSR...L 953 | <i>Ala-p35</i> <b>39</b>    | 94 NLSTF↓AQPP...R 307  |
| <i>Thr-Gln</i> RS <b>40</b>  | 102 ARLEE↓TDRK...I 775  | <i>Ser-Gap</i> 43 <b>41</b> | 36 TKIQA↓SFRG...A 227  | <i>Ser-p43</i> <b>42</b>    | 101 VTTVS↓SSGT...K 312 |
| <i>Gly-Fak</i> <b>43</b>     | 741 HYQVS↓GGYP...H 1052 | <i>Ser-TH</i> <b>44</b>     | 26 AEAVT↓SPRF...S 498  | <i>Gly-Anxa</i> 1 <b>45</b> | 25 VQTVK↓GSKG...N 346  |

**Fig. S1.** Calpain-generated natural C-terminal (Ct) fragments of mammalian proteins. This list is but a small subset of natural calpain substrates in a mammal.

(A) Ct-fragments with numbers in green are experimentally characterized and validated substrates of the Arg/N-degrogen pathway (Fig. 2) (1, 2). Ct-fragments with numbers in black are predicted Arg/N-degrogen substrates. Each entry cites a calpain-generated Ct-fragment and the fragment's N-terminal (Nt) residue (in red), using 3-letter abbreviations for amino acids. A calpain cleavage site, indicated by an arrowhead, is denoted using single-letter abbreviations for amino acids. A P1' residue (in red and enlarged) becomes Nt-residue upon the cleavage. The indicated residue numbers are, respectively, the number of the first shown residue of a full-length protein precursor and the number of its last residue. Residue numbers of proteins are counted from their initially present Nt-Met residue, irrespective of whether or not Nt-Met is removed by Met-aminopeptidases. All entries are mouse proteins, save for #14 and #24, which are human proteins.

(B) Same as in A but examples of calpain-generated Ct-fragments whose Nt-residues are not recognized by the Arg/N-degrogen pathway (Fig. 2).

#1. *Asp-Bcl<sub>XL</sub>*. Bcl<sub>XL</sub> is a 26 kDa antiapoptotic regulatory protein (3, 4). Under conditions that include glucose and oxygen deprivation, Bcl<sub>XL</sub> can be cleaved by activated calpain-1, resulting in the 21 kDa Asp<sup>61</sup>-Bcl<sub>XL</sub> Ct-fragment. In contrast to full-length Bcl<sub>XL</sub>, Asp<sup>61</sup>-Bcl<sub>XL</sub> has proapoptotic activity (5), and has been shown to be a short-lived substrate of the Arg/N-degron pathway (6).

#2. *Asp-Capns1* is the Ct-fragment of the calpain regulatory subunit that is cleaved by activated calpains (7, 8).

#3. *Glu-Bak* is the proapoptotic Ct-fragment of the apoptotic regulator BAK. Glu-BAK is generated by calpain-1 in vitro and is apparently formed in vivo as well (9).

#4. *Glu-IκBα* is the Ct-fragment of the IκBα subunit of the NFκB-IκBα complex in which the NFκB transcriptional regulator is inhibited by IκBα. The IκBα subunit is targeted for degradation either through a conditional phosphodegron or through a calpain-mediated cleavage (10).

#5. *Arg-Bid*. Bid is a 22 kDa member of the BCL-2 family of apoptosis regulators (3, 11, 12). Although full-length Bid is a proapoptotic protein, its Ct-fragments, which can be naturally produced by activated caspases, calpains or granzyme B, can be even more active than intact Bid as proapoptotic protein fragments (13). The cleavage of Bid by calpains produces the 14 kDa Arg<sup>71</sup>-Bid fragment (13-16) that has been shown to be a short-lived substrate of the Arg/N-degron pathway (6).

#6. *Arg-c-Fos* is the Ct-fragment of the c-Fos transcriptional regulator. c-Fos is targeted for conditional degradation through several degrons, including the path that involves the cleavage by calpains (17).

#7. *Arg-Igfbp2* is the calpain-generated Ct-fragment of the insulin-like growth factor binding protein-2 (18).

#8. *Arg-Atp2b2* is the Ct-fragment of the transmembrane Atp2b2 plasma membrane Ca<sup>2+</sup> pump (PMCA) that ejects Ca<sup>2+</sup> from cells. This pump is activated either by the binding of Ca<sup>2+</sup>/calmodulin or by the calpain-mediated truncation of Atp2b2 that generates the *Arg-Atp2b2* fragment and thereby activates the pump (19).

#9. *Arg-Ankrd2*. Ankrd2 (Marp2, Arpp), a member of the MARP (muscle ankyrin repeat protein) family, functions as a negative regulator of muscle differentiation (20). Calpains can produce the 30 kDa Arg<sup>103</sup>-Ankrd2 Ct-fragment (21).

#10. *Lys-Ica512*. Ica512 (Ptrn) is a member of the transmembrane receptor protein phosphatase family (22). The 43 kDa calpain-generated mouse Lys<sup>609</sup>-Ica512 Ct-fragment enters the nucleus and acts as a transcriptional regulator (22, 23).

#11. *Tyr-Grm1*. Grm1 is the Ct-fragment of the mGluR1α transmembrane metabotropic glutamate receptor (24). Receptors containing the calpain-truncated mGluR1α Ct-fragment can elevate cytosolic Ca<sup>2+</sup> but cannot activate PI<sub>3</sub>K-Akt signaling pathways, in contrast to uncleaved receptors (24, 25).

#12. *Leu-Capn1* is the auto-generated, catalytically active Ct-fragment of calpain-1 (26, 27).

#13. *Phe-GluN2a*. GluN2a (NMDA-R2a) is a subunit of the N-methyl-D-aspartate receptor (NMDAR), a glutamate receptor that can function as a ligand-gated Ca<sup>2+</sup> channel (28, 29). The GluN2b subunit of NMDAR can also be cleaved by calpains (30). Ct-fragments of NR2A and NR2B contain domains required for the association of these subunits with other synaptic proteins. NMDAR receptors lacking a Ct-region of GluN2a could function as

glutamate-gated  $\text{Ca}^{2+}$  channels but the intracellular traffic of cleaved receptors and their electrophysiological properties were altered (31).

#14. *Asn*-DSCR1 (Rcan1) is the calpain-generated Ct-fragment of the Down syndrome critical region 1 protein Dscr1, which binds to Raf1, inhibits the phosphatase activity of calcineurin, and enhances its degradation. The *Asn*-DSCR1 fragment does not bind to the Raf1 kinase (32).

#15. *Asn*- $\text{Ca}_v1.1$  is the Ct fragment of the voltage-gated transmembrane  $\text{Ca}^{2+}$  channel. This (apparently) calpain-generated fragment is noncovalently associated with the rest of the channel and can inhibit its activity. Upon dissociation from the channel, the *Asn*- $\text{Ca}_v1.1$  fragment enters the nucleus and acts as a transcriptional regulator (33-36).

#16. *Asn*-Bfl-1. Bfl-1 is antiapoptotic regulatory protein whose cleavage by calpain-1 generates the *Asn72*-Bfl-1 proapoptotic Ct-fragment (37).

#17. *Gln*-Ryr1 is the Ct-fragment of the Ryr1 ryanodine receptor, a  $\text{Ca}^{2+}$  channel in the ER (38) that mediates the efflux of  $\text{Ca}^{2+}$  from the ER into the cytosol. Calpain-mediated cleavage of Ryr1 increases  $\text{Ca}^{2+}$  efflux (39).

#18. *Gln*-talin is the calpain-generated Ct-fragment of talin, an adaptor protein that interacts with the integrin family of cell adhesion transmembrane proteins (19, 40, 41).

#19. *Gln*-Egfr is one of calpain-generated Ct-fragments of the transmembrane epidermal growth factor (EGF) receptor protein kinase (42). Remarkably, all 7 calpain cleavage sites in the cytosol-exposed domain of the 170-kDa EGFR contain P1' residues that are recognized as destabilizing by the Arg/N-degron pathway (42).

#20. *Gln*-PrkC $\beta$  is the Ct-fragment of PrkC $\beta$ , a Ser/Thr PKC kinase (43).

#21. *Arg*-dystrophin is the calpain-generated Ct-fragment of a major cytoskeletal protein in the skeletal muscle (44).

#22. *Arg*-Mef2d is the Ct-fragment of the Mef2d myocyte enhancer factor 2d, a transcriptional regulator that contributes to neuronal survival, development, and synaptic plasticity (45).

#23. *Arg*-p39 is the calpain-generated Ct-fragment of the p39 activator of the Cdk5 protein kinase (46). The indicated cleavage site is located immediately downstream of two other closely spaced (and strongly conserved) calpain cleavage sites in p39. A cleavage at any one of these sites yields a predicted Arg/N-degron substrate.

#24. *Arg*-caspase-9 is the Ct-fragment of caspase-9, which can be inactivated by calpains (47), followed by the (predicted) degradation of the *Arg*-caspase-9 Ct-fragment by the Arg/N-degron pathway.

#25. *Arg*-Glyt1a is the Ct-fragment of the transmembrane Glyt1a glycine transporter (48). Another Gly transporter, Glyt1b, is also cleaved by calpains, yielding the *Arg*-Glyt1b fragment (48). These Ct fragments are still active as transporters but are impaired in their ability to remove Gly (an inhibitory neurotransmitter) from synaptic clefts (48).

#26. *Lys*-Ppp3ca is the calpain-generated Ct-fragment of the Ser/Thr protein phosphatase 2B (catalytic subunit, alpha isoform) (49, 50).

#27. *Lys*-Pkc $\alpha$  is the calpain-generated Ct-fragment of Pkc $\alpha$ , a broadly expressed Ser/Thr kinase of the PKC family (51). Being catalytically active but no longer controlled by the regulatory Nt-domain of the full-length Pkc $\alpha$ , the *Lys*-Pkc $\alpha$  fragment can be toxic, for example, upon its formation in an ischemic heart (52).

#28. *Lys*-cortactin is the Ct-fragment of cortactin, an actin-binding protein that regulates actin polymerization (53).

#29. *Leu-Nf2* is the calpain-generated Ct-fragment of NF2 (merlin), a tumor suppressor and cytoskeletal protein. Loss of function NF2 mutants result in autosomal-dominant neurofibromatosis, a predisposition to specific kinds of brain tumors (54).

#30. *Leu-troponin T2* is the Ct-fragment of the cardiac troponin T that is produced by calpain-1 in the troponin-containing cardiac myofibril complex (55).

#31. *Leu-Rad21* is the calpain-generated Ct-fragment of the Scc1/Rad21 subunit of the chromosome-associated cohesin complex (56). The calpain-mediated generation of *Leu-Rad21* contributes to the control of chromosome cohesion/segregation, together with processes that include the separase-mediated cleavage of the same Rad21 subunit of cohesin (56-59).

#32. *Leu-STEP<sub>33</sub>* is the Ct-fragment of the striatal-enriched STEP<sub>61</sub> phosphatase, a brain-specific Tyr-phosphatase whose substrates include the MAPK-family kinases Erk1/2 and p38. The calpain-generated *Leu-STEP<sub>33</sub>* fragment lacks phosphatase activity (60).

#33. *Leu-vimentin* is the calpain-generated Ct-fragment of vimentin, a component of intermediate filaments (61).

#34. *Leu-β-catenin (Ctnnb)* is the calpain-generated Ct-fragment of β-catenin, a conditionally short-lived cytoskeletal protein and transcriptional regulator. The *Leu-β-catenin* fragment is a nuclear protein that activates specific genes in conjunction with other transcription factors (62).

#35. *Leu-Camk4* is the calpain-generated Ct-fragment of the Ca<sup>2+</sup>/calmodulin-dependent kinase-IV. This fragment lacks kinase activity (63).

#36. *Phe-PrkCγ* is the calpain-generated Ct-fragment of PkCγ, a Ser/Thr kinase of the PKC family (51). The *Phe-PrkCγ* fragment is constitutively active as a kinase, because it lacks the regulatory Nt-domain of the full-length PrkCγ kinase (51).

#37. *Ala-Pde1a2* is the calpain-generated Ct-fragment of Pde1a2, an isoform of calmodulin-dependent cyclic nucleotide phosphodiesterase (64).

#38. *Ser-Copb1* is the calpain-generated Ct-fragment of the Copb1 coatomer, a component of the cytosolic protein complex that binds to dilysine motifs and reversibly associates with Golgi non-clathrin-coated vesicles.

#39. *Ala-p35* is the calpain-generated Ct-fragment of p35, a neuron-specific activator Cdk5, a cyclin-dependent kinase (65).

#40. *Thr-GlnRS* is the calpain-generated Ct-fragment of GlnRS, a Thr-tRNA synthetase (66).

#41. *Ser-Gap43* is the calpain-generated Ct-fragment of Gap43, a protein with functions in axon guidance, synaptic plasticity and regulation of neuronal death and survival (67, 68).

#42. *Ser-p43* is the calpain-generated Ct-fragment of p43, a component of specific complex containing several aminoacyl-tRNA synthetases (66).

#43. *Gly-Fak* is the calpain-generated Ct-fragment of the focal adhesion kinase Fak, which regulates adhesive properties of cells (69, 70).

#44. *Ser-TH* is the calpain-generated Ct-fragment of tyrosine hydroxylase (71, 72).

#45. *Gly-Anxa1* is the calpain-generated Ct-fragment of annexin-1, a member of the annexin family of Ca<sup>2+</sup>-binding/phospholipid binding proteins. Annexin-1 acts, in particular, as a mediator of glucocorticoid action in inflammation and in the control of anterior pituitary hormone release (73, 74).

**Caspase-generated C-terminal (Ct) protein fragments that are either identified or predicted substrates of the Arg/N-degron pathway**

| Ct-fragment                                                                                    | cleavage site                          | Ct-fragment                                                          | cleavage site                          |
|------------------------------------------------------------------------------------------------|----------------------------------------|----------------------------------------------------------------------|----------------------------------------|
| Proapoptotic caspase-generated Ct-fragments that are <b>identified</b> Arg/N-degron substrates |                                        |                                                                      |                                        |
| <b>Cys-RIPK1</b> ; S/T kinase, regulator of apoptosis                                          | 321 SLQHD <b>C</b> 656<br>1 CVPL...S   | <b>Cys-TRAF1</b> ; regulator of apoptosis                            | 152 DLEVD <b>C</b> 409<br>2 CYRA...A   |
| <b>Asp-BRCA1</b> ; multifunctional tumor suppressor                                            | 1118 DDLLD <b>D</b> 1812<br>3 VEI...D  | <b>Leu-LIMK1</b> ; Ser/Thr protein kinase                            | 236 LDEID <b>L</b> 647<br>4 LIQ...D    |
| <b>Tyr-NEDD9</b> ; regulator of cell adhesion                                                  | 626 MDDYD <b>Y</b> 834<br>5 VHL...F    | <b>Arg-BIM<sub>EL</sub></b> ; regulator of apoptosis                 | 9 SSECD <b>R</b> 196<br>6 REGG...H     |
| <b>Asp-EPHA4</b> ; transmembrane dependence receptor                                           | 769 RVLED <b>D</b> 986<br>7 PEA...V    | <b>Tyr-MET</b> ; transmembrane dependence receptor                   | 996 NESVD <b>Y</b> 1379<br>8 RAT...S   |
| Proapoptotic caspase-generated Ct-fragments that are <b>predicted</b> Arg/N-degron substrates  |                                        |                                                                      |                                        |
| <b>Asn-PKC<math>\delta</math></b> ; Ser/Thr protein kinase                                     | 325 EDMQD <b>N</b> 676<br>9 SGT...D    | <b>Lys-PKC<math>\theta</math></b> ; Ser/Thr protein kinase           | 350 LDEVD <b>K</b> 706<br>10 MCH...S   |
| <b>Trp-ETK</b> ; Tyr protein kinase                                                            | 236 EDFPD <b>W</b> 675<br>11 WQV...H   | <b>Gln-SLK</b> ; S/T kinase, regulator of actin                      | 432 PDTQD <b>Q</b> 1202<br>12 QTV...S  |
| <b>Ile-HPK1</b> ; Ser/Thr protein kinase                                                       | 381 YDDVD <b>I</b> 833<br>13 PTP...L   | <b>Ile-MLH1</b> ; DNA repair protein                                 | 414 EDKTD <b>I</b> 756<br>14 ISS...C   |
| Other caspase-generated Ct-fragments that are <b>predicted</b> Arg/N-degron substrates         |                                        |                                                                      |                                        |
| <b>Tyr-CYLD</b> ; deubiquitylase (DUB)                                                         | 211 ALES D <b>Y</b> 952<br>15 AGP...K  | <b>Leu-p21</b> ; p21 <sup>Cip1/Waf1</sup> inhibitor of cell division | 107 EDHVD <b>L</b> 164<br>16 SLS...P   |
| <b>Arg-IP<sub>3</sub>R</b> ; inositol 1,4,5-triphosphate receptor                              | 1887 DDEVD <b>R</b> 2749<br>17 DAP...A | <b>Asn-LMN1</b> ; lamin-A, a component of nuclear lamina             | 295 LVEID <b>N</b> 476<br>18 NGKQ...M  |
| <b>Arg-ETS-1</b> ; a transcription factor                                                      | 258 YDSCD <b>R</b> 441<br>19 RL TQ...E | <b>Tyr-TOP1</b> ; DNA topoisomerase I                                | 142 EDDAD <b>Y</b> 765<br>20 KPK...F   |
| <b>Leu-MEFD2</b> ; a transcription factor                                                      | 287 EDHLD <b>L</b> 521<br>21 NNA...K   | <b>Asn-DNA-PK</b> ; DNA-dependent protein kinase                     | 2709 GDEVD <b>N</b> 5028<br>22 KVK...M |
| <b>Asn-CAD1</b> ; E-cadherin, an adhesion receptor                                             | 746 DDTRD <b>N</b> 882<br>23 NVYY...D  | <b>Gln-synphilin-1</b> ; a ligand of $\alpha$ -synuclein             | 450 LDEVD <b>Q</b> 919<br>24 DGN...A   |
| <b>Tyr-ACINUS</b> ; a mediator of chromatin condensation                                       | 1089 QDELD <b>Y</b> 1341<br>25 HRG...R | <b>Lys-PLECTIN</b> ; a cytoskeletal protein                          | 2390 LILRD <b>K</b> 4684<br>26 DNT...A |
| <b>Cys-CCNE1</b> ; a G1-S cyclin                                                               | 271 VLDVD <b>C</b> 395<br>27 CLEF...A  | <b>His-PMCA4b</b> ; a Ca <sup>2+</sup> extrusion pump                | 1076 LDEID <b>H</b> 1170<br>28 AEM...P |
| <b>Asp-CDC42</b> ; a RAS superfamily member                                                    | 117 IDLRD <b>D</b> 191<br>29 PST...F   | <b>Tyr-iPLA<sub>2</sub></b> ; Ca-independent phospholipase           | 179 MDVTD <b>Y</b> 752<br>30 KGE...P   |

**Fig. S2.** Caspase-generated natural C-terminal (Ct) fragments of intracellular proteins that are either experimentally confirmed (marked in green) or predicted (marked in black) substrates of the Arg/N-degron pathway. As indicated in the diagram, some of these Ct-fragments have proapoptotic activities (6). This list of confirmed or putative Arg/N-degron substrates of caspases is but a small subset of known putative Arg/N-degron substrates of this kind, most of which remain to be analyzed. The list contains both human and mouse proteins; all of them are denoted by all-capital notations for human proteins.

Caspase recognition sites are underlined. Each entry cites a caspase-generated Ct-fragment of a protein and the fragment's N-terminal (Nt) residue (in red), using 3-letter abbreviations for amino acids. A caspase cleavage site, indicated by an arrowhead, is denoted using single-letter abbreviations for amino acids. A P1' residue (in red and enlarged) becomes Nt-residue upon a cleavage by a caspase. Residue numbers are, respectively, the number of the first shown residue of a full-length protein precursor and the number of its last residue. Residue numbers are counted from their initially present Nt-Met, irrespective of whether or not Nt-Met is removed by Met-aminopeptidases.

The first section of this diagram describes 8 previously identified natural proapoptotic Ct-fragments, specifically Cys-Ripk1, Cys-TRAF1, Asp-BRCA1, Leu-LIMK1, Tyr-NEDD9, Arg-BIM<sub>EL</sub>, Asp-EPHA4, and Tyr-MET. They were found to be short-lived substrates of the Arg/N-degron pathway (6).

The diagram's second section describes six other previously identified proapoptotic Ct-fragments (all of them are produced by caspases) bearing destabilizing Nt-residues that can be recognized by the Arg/N-degron pathway. These fragments remain to be verified as Arg/N-degron substrates.

#9. *Asn*-Pkc $\delta$  is the Ct-fragment of the protein kinase C $\delta$  (Pkc $\delta$ ) that can be generated by (in particular) caspase-3. This fragment bears Nt-Asn and is proapoptotic, in contrast to the full-length Pkc $\delta$  kinase (75-79).

#10. *Lys*-Pkc $\theta$  is the Ct-fragment of the protein kinase C $\theta$  (Pkc $\theta$ ). This fragment can be generated by (in particular) caspase-3, bears Nt-Lys, and is proapoptotic, in contrast to the full-length Pkc $\theta$  kinase (80).

#11. *Trp*-Etk is the Ct-fragment of the Etk/Bmc tyrosine kinase, a member of the Btk/Tek family of kinases, at least some of which regulate apoptosis. The Trp-Etk fragment can be generated by (in particular) caspase-3, bears Nt-Trp, and is proapoptotic, in contrast to the full-length Etk kinase (81).

#12. *Gln*-Slk is the Ct-fragment of Slk, a Ste20-related protein kinase that plays a role in regulation of actin fibers. The Gln-Slk fragment can be generated by (in particular) caspase-3, bears Nt-Gln, and is proapoptotic. The concomitantly produced Nt-fragment of Slk is also proapoptotic (82).

#13. *Ile*-Hhp1 is the Ct-fragment of the hematopoietic progenitor kinase 1 (Hpk1), a Ste20-related protein kinase whose functions include stimulation of the stress-activated protein kinases SAPKs/JNKs and the NF- $\kappa$ B transcriptional regulon. The Ile-Hpk1 fragment can be generated by (in particular) caspase-3, bears Nt-Ile, and is proapoptotic, in contrast to the full-length Hk1 kinase (83).

#14. *Ile*-Mlh1 is the Ct-fragment of the mismatch repair Mlh1 protein that can be generated by (in particular) caspase-3, bears Nt-Ile, resides in the cytosol (in contrast to the full-length nuclear MLH1) and is proapoptotic, unlike full-length MLH1 (84).

The next 16 caspase-generated Ct-fragments and predicted substrates of the Arg/N-degron pathway that are not necessarily proapoptotic.

#15. *Tyr*-CYLD is the Ct-fragment of a deubiquitylase that regulates apoptosis and necroptosis (85).

#16. *Leu*-p21<sup>Cip1/Waf1</sup> is the Ct-fragment of p21, an inhibitor of cell division (86).

#17. *Arg*-IP<sub>3</sub>R is the Ct-fragment of the inositol 1,4,5-triphosphate receptor (87).

#18. *Asn*-LMN1 is the Ct-fragment of lamin-A, a subunit of nuclear lamina (88).

#19. *Arg*-ETS-1 is the Ct-fragment of a transcription factor (89).

- #20. *Tyr*-TOP1 is the Ct-fragment of a type I DNA topoisomerase (90).
- #21. *Leu*-MEFD2 is the Ct-fragment of a transcription factor (91).
- #22. *Asn*-DNA-PK is the Ct-fragment of the DNA-dependent protein kinase (92).
- #23. *Asn*-CAD1 is the Ct-fragment of E-cadherin, an adhesion receptor (93).
- #24. *Gln*-Synphilin-1 is the Ct-fragment of synphilin-1, a ligand of  $\alpha$ -synuclein (94).
- #25. *Tyr*-ACINUS is the Ct-fragment of a mediator of apoptotic chromatin condensation (95).
- #26. *Lys*-PLECTIN is the Ct-fragment of a cytoskeletal protein (96).
- #27. *Cys*-CCNE1 is the Ct-fragment of a specific G1/S cyclin (97).
- #28. *His*-PMCA4b is the Ct-fragment of a  $\text{Ca}^{2+}$  extrusion pump (98).
- #29. *Asp*-CDC42 is the Ct fragment of CDC42, a RAS superfamily member (99).
- #30. *Tyr*-iPLA<sub>2</sub> is the Ct-fragment of the phospholipase A<sub>2</sub> (100).



## Retention of destabilizing activity (but not necessarily the identity) of P1' residues in calpain cleavage sites during evolution of vertebrates

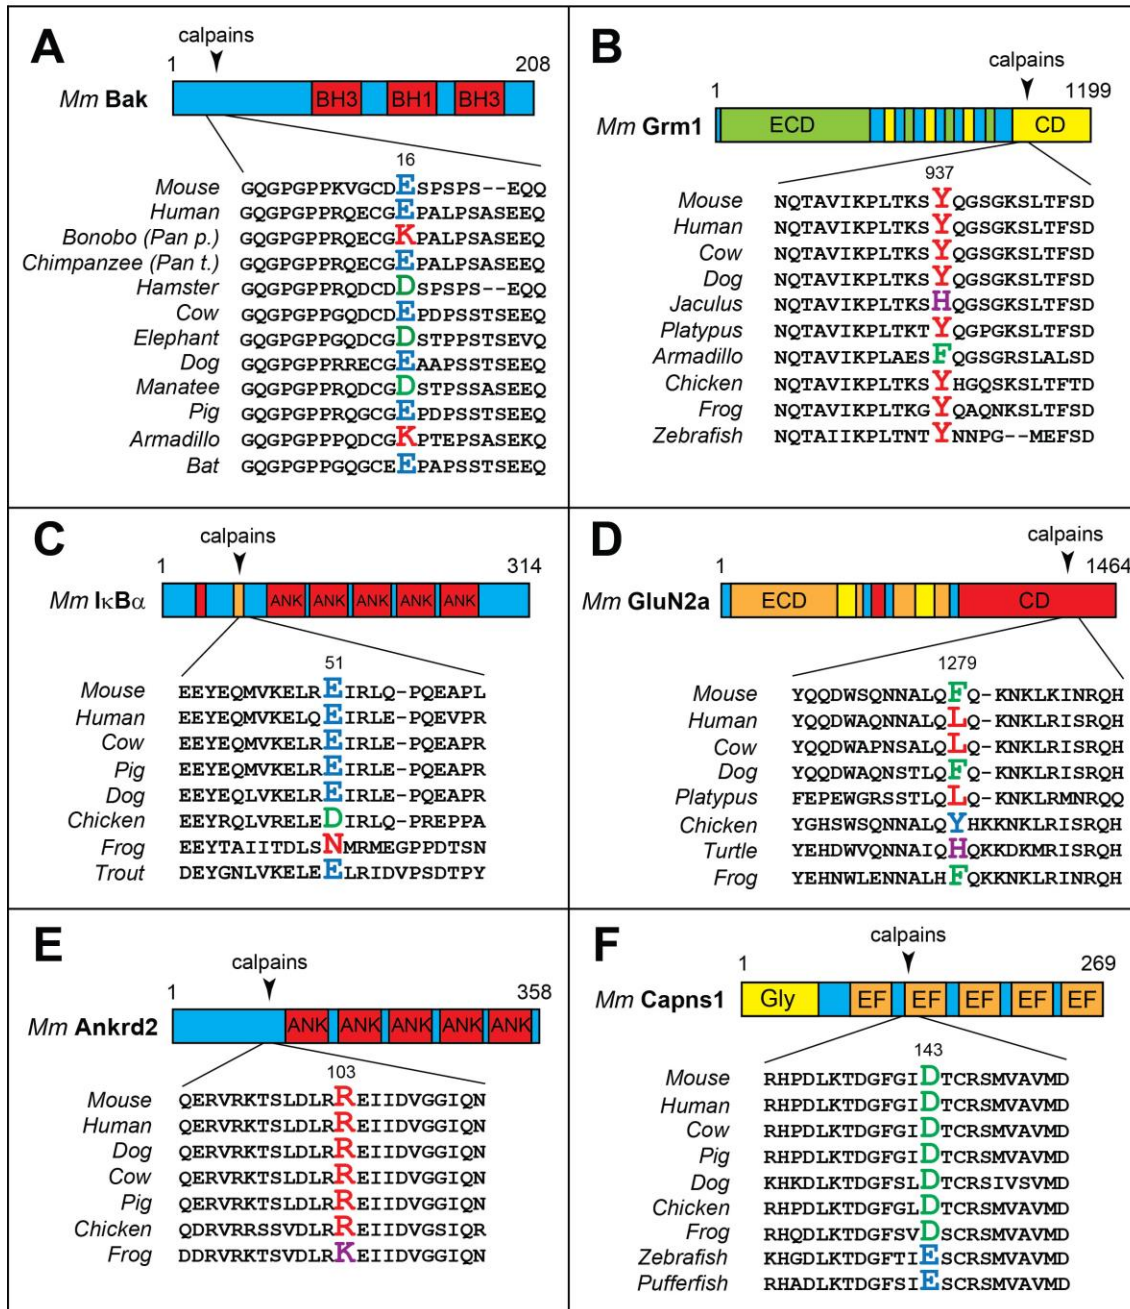

**Fig. S3.** Retention of destabilizing activity (but not necessarily the identity) of P1' residues in calpain cleavage sites during evolution of vertebrates.

Arrowheads indicate calpain cleavage sites. P1' residues, which become N-terminal upon the cleavage, are larger and colored. The diagrams and indicated residue numbers are of mouse [*Mus musculus (Mm)*] caspase substrates, some of which are cited in Fig. S1.

(A) Bak. The P1' residue (future Nt-residue) is **Glu** in mouse, human, chimpanzee, and bat, is **Lys** in bonobo (a close relative of chimpanzee) and armadillo; and is **Asp** in hamster,

elephant, and manatee. All of these Nt-residues are destabilizing in the Arg/N-degron pathway (see the main text and Fig. 2).

(B) Grm1. The P1' residue (future Nt-residue) is **Tyr** in all cited species save for jaculus (a rodent) and armadillo, in which P1' residues are, respectively, **His** and **Phe**. All of these Nt-residues are destabilizing in the Arg/N-degron pathway (see the main text and Fig. 2).

(C) IκBα. The P1' residue (future Nt-residue) is **Glu** in all cited species except chicken and frog, in which P1' residues are, respectively, **Asp** and **Asn**. All of these Nt-residues are destabilizing in the Arg/N-degron pathway (see the main text and Fig. 2).

(D) GluN2a. The P1' residue (future Nt-residue), is **Phe** in mouse, dog, and frog, is **Leu** in human, cow, and platypus, is **Tyr** in chicken, and is **His** in turtle. All of these Nt-residues are destabilizing in the Arg/N-degron pathway (see the main text and Fig. 2).

(E) Ankrd2. The P1' residue (future Nt-residue) is **Arg** in all cited species except frog, in which P1' is **Lys**. All of these Nt-residues are destabilizing in the Arg/N-degron pathway (see the main text and Fig. 2).

(F) Capsn1. The P1' residue (future Nt-residue) is **Asp** in all cited species except zebrafish and pufferfish, in which P1' is **Glu**. All of these Nt-residues are destabilizing in the Arg/N-degron pathway (see the main text and Fig. 2).

Retention of destabilizing activity (but not necessarily the identity) of P1' residues in **caspase** cleavage sites during animal evolution

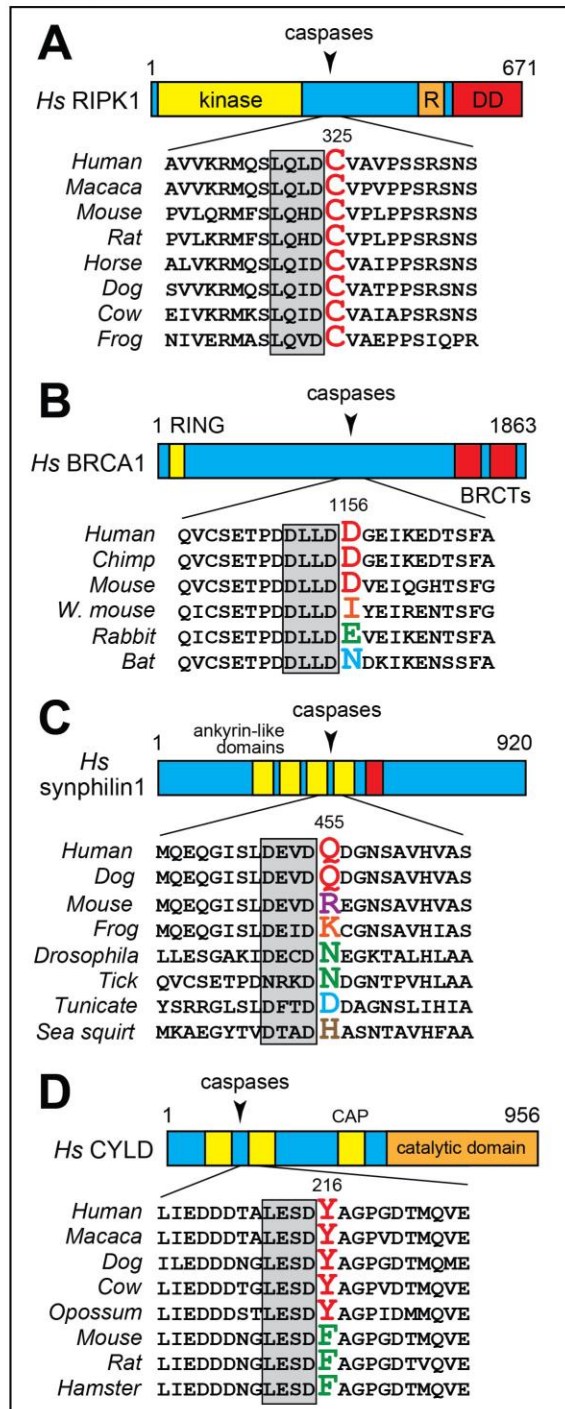

**Fig. S4.** Retention of *destabilizing* activity (but not necessarily the *identity*) of P1' residues in **caspase** cleavage sites during animal evolution.

Arrowheads indicate caspase cleavage sites, which are highlighted by grey rectangles. P1' residues, which become N-terminal upon cleavage by a caspase, are larger and colored. The diagrams and indicated residue numbers are of human caspase substrates, which are cited in Fig. S2.

(A) RIPK1. The P1' residue (future Nt-residue) is **Cys** in all cited species. Nt-**Cys** is destabilizing in the Arg/N-degron pathway (see the main text and Fig. 2).

(B) BRCA1. The P1' residue (future Nt-residue) is **Asp** in human, chimpanzee and mouse, is **Ile** in western mouse (an Australian rodent), is **Glu** in rabbit, and is **Asn** in bat. All of these Nt-residues are destabilizing in the Arg/N-degron pathway (see the main text and Fig. 2).

(C) Synphilin1. The P1' residue (future Nt-residue) is **Gln** in human and dog, is **Arg** in mouse, is **Lys** in frog, is **Asn** in a tick and fruit fly (*Drosophila*), is **Asp** in a tunicate (a marine invertebrate), and is **His** in sea squirt. All of these Nt-residues are destabilizing in the Arg/N-degron pathway (see the main text and Fig. 2).

(D) GluN2a. The P1' residue (future Nt-residue) is **Tyr** in human, macaca, dog and cow, and is **Phe** in mouse, rat and hamster. All of these Nt-residues are destabilizing in the Arg/N-degron pathway (see the main text and Fig. 2).

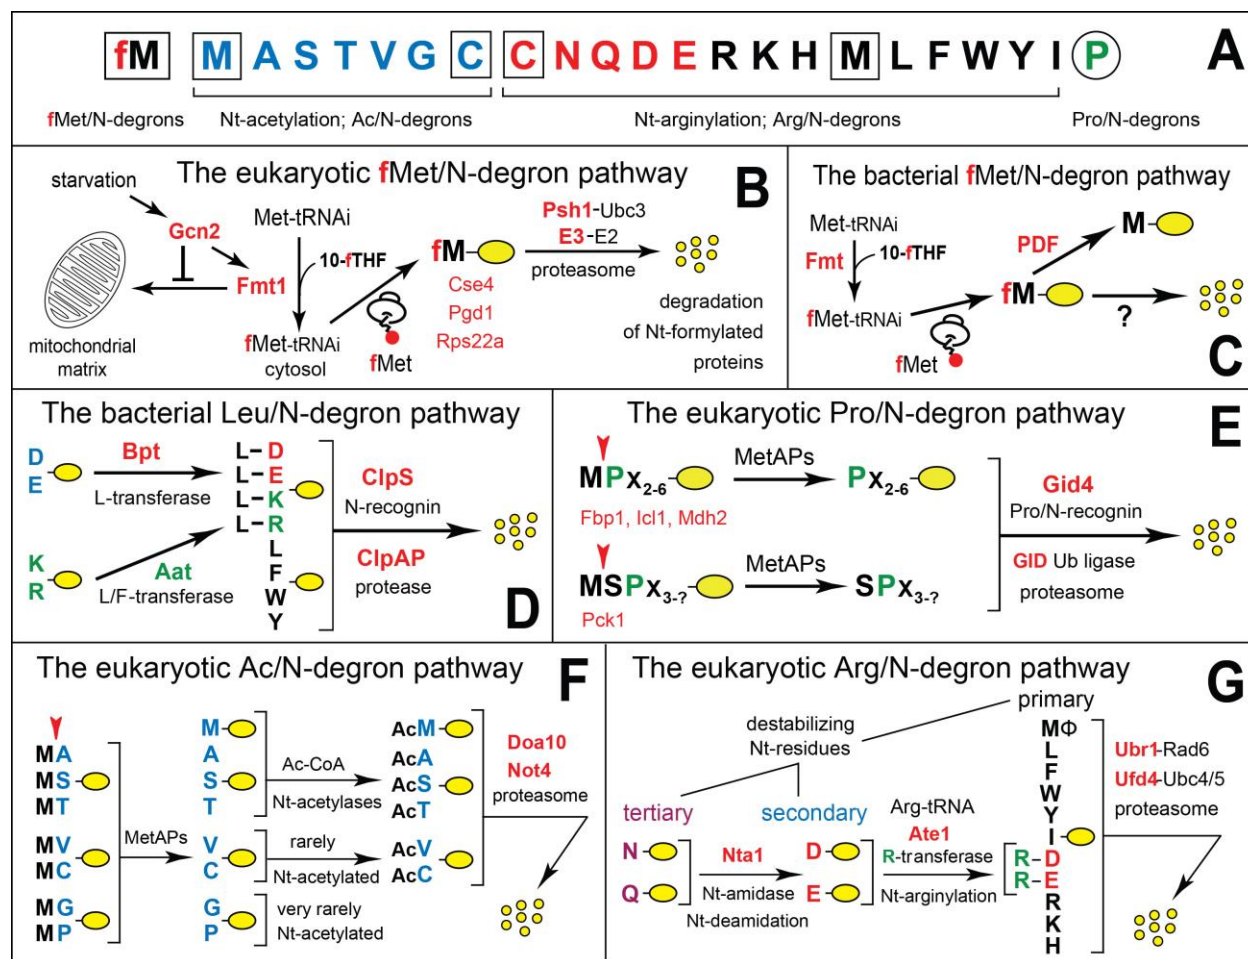

**Fig. S5.** N-degron pathways. N-terminal (Nt) residues are indicated by single-letter abbreviations. A yellow oval denotes the rest of a protein substrate.

(A) Twenty amino acids of the genetic code are arranged to delineate specific N-degrons. Nt-Met is cited thrice, since it can be recognized by the Ac/N-degron pathway (as Nt-acetylated Ac-Met), by the Arg/N-degron pathway (as unacetylated Nt-Met), and by the fMet/N-degron pathway (as Nt-formylated fMet). Nt-Cys is cited twice, since it can be recognized by the Ac/N-degron pathway (as Nt-acetylated Cys) and by the Arg/N-degron pathway (as an oxidized, arginylatable Nt-cysteine sulfinate or sulfonate, formed in multicellular eukaryotes but apparently not in unstressed *S. cerevisiae*).

(B) The eukaryotic (*S. cerevisiae*) fMet/N-degron pathway (101). 10-fTHF, 10-formyltetrahydrofolate.

(C) The bacterial (*E. coli*) fMet/N-degron pathway (102).

(D) The bacterial (*V. vulnificus*) Leu/N-end rule pathway (103).

(E) The eukaryotic (*S. cerevisiae*) Pro/N-degron pathway (104-106).

(F) The eukaryotic (*S. cerevisiae*) Ac/N-degron pathway (107-110).

(G) The eukaryotic (*S. cerevisiae*) Arg/N-degron pathway (2, 111, 112). Modified with permission from ref. (2).



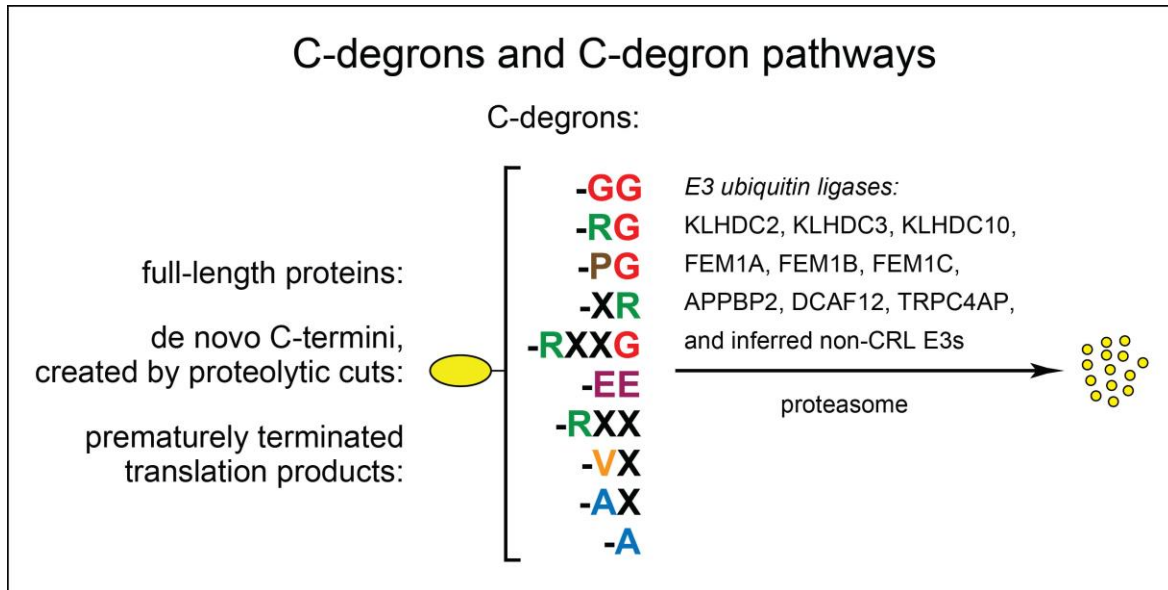

**Fig. S6.** C-degrons and C-degron pathways in human cells. This diagram is a simplified summary of the 2018 discovery, by the laboratories of Elledge and Yen, of a large set of C-degrons in human proteins (113-115). Amino acid residues are denoted by single-letter abbreviations. A yellow oval denotes a protein substrate upstream of its C-terminus. The indicated C-terminal (Ct) sequences and individual Ct-residues, referred to as C-degrons, are targeted, in conjunction with internal Lys residues (ubiquitylation sites) of individual C-degron substrates, by a broad range of Ub ligases, largely but not solely of the CRL class (113-115). See the main text for a brief discussion of C-degron pathways.

## SI References

1. Piatkov KI, Oh J-H, Liu Y, Varshavsky A (2014) Calpain-generated natural protein fragments as short-lived substrates of the N-end rule pathway. *Proc. Natl. Acad. Sci. USA* 111:E817-E826.
2. Varshavsky A (2019) N-degron and C-degron pathways of protein degradation. *Proc. Natl. Acad. Sci. USA* 116:358-366.
3. Green DR (2011) *Means to an End: Apoptosis and Other Cell Death Mechanisms*. (Cold Spring Harbor Laboratory Press, Cold Spring Harbor, NY).
4. García-Sáez AJ, Ries J, Orzáez M, Pérez-Payà E, Schulle P (2009) Membrane promotes tBID interaction with BCL(XL). *Nat. Struct. Mol. Biol.* 16:1178-1185.
5. Nakagawa T, Yuan J (2000) Cross-talk between two cysteine protease families: activation of caspase-12 by calpain in apoptosis. *J. Cell Biol.* 150:887-894.
6. Piatkov KI, Brower CS, Varshavsky A (2012) The N-end rule pathway counteracts cell death by destroying proapoptotic protein fragments. *Proc. Natl. Acad. Sci. USA* 109:E1839-E1847.
7. Ono Y, Sorimachi H (2012) Calpains: an elaborate proteolytic system. *Biochim. Biophys. Acta* 1824:224-236.
8. Goll DE, Thompson VF, Li H, Wei W, Cong J (2003) The calpain system. *Physiol. Rev.* 83:731-801.
9. Moldoveanu T, *et al.* (2006) The X-ray structure of a BAK homodimer reveals an inhibitory zinc binding site. *Mol. Cell* 24:677-688.
10. Schaecher K, Goust JM, Banik NL (2004) The effects of calpain inhibition on I $\kappa$ B $\alpha$  degradation after activation of PBMCs: identification of the calpain cleavage sites. *Neurochem. Res.* 29:1443-1451.
11. Yin X-M (2006) Bid, a BH3-only multifunctional molecule, is at the cross road of life and death. *Gene* 369:7-19.
12. Billen LP, Shamas-Din A, Andrews DW (2009) Bid: a Bax-like BH3 protein. *Oncogene* 27:S93-S104.
13. Chen M, *et al.* (2001) Bid is cleaved by calpain to an active fragment in vitro and during myocardial ischemia/reperfusion. *J. Biol. Chem.* 276:30724-30728.
14. Mandic A, *et al.* (2002) Calpain-mediated Bid cleavage and calpain-independent Bak modulation: two separate pathways in cisplatin-induced apoptosis. *Mol. Cell. Biol.* 22:3003-3013.
15. Gil-Parrado S, *et al.* (2002) Ionomycin-activated calpain triggers apoptosis. A probable role for Bcl-2 family members. *J. Biol. Chem.* 277:27217-27226.
16. Cabon L, *et al.* (2012) BID regulates AIF-mediated caspase-independent necroptosis by promoting BAX activation. *Cell Death Diff.* 19:245-256.
17. Pariat M, *et al.* (2000) The sensitivity of c-Jun and c-Fos proteins to calpains depends on conformational determinants of the monomers and not on formation of dimers. *Biochem. J.* 345:129-138.
18. Berg U, Bang P, Carlsson-Skwirut C (2007) Calpain proteolysis of insulin-like growth factor binding protein (IGFBP) -2 and -3, but not of IGFBP-1. *Biol. Chem.* 388:859-863.
19. Di Leva F, Domi T, Fedrizzi L, Lim d, Carafoli E (2008) The plasma membrane Ca<sup>2+</sup>-ATPase of animal cells: Structure, function and regulation. *Arch. Biochem. Biophys.* 476:65-74.



20. Bean C, Facchinello N, Faulkner G, Lanfranchi G (2008) The effects of Ankrd2 alteration indicate its involvement in cell cycle regulation during muscle differentiation. *Biochim. Biophys. Acta* 1783:1023-1035.
21. Hayashi C, *et al.* (2008) Multiple molecular interactions implicate the connectin/titin N2A region as a modulating scaffold for p94/calpain 3 activity in skeletal muscle. *J. Biol. Chem.* 283:14801-14814.
22. Trajkovski M, *et al.* (2004) Nuclear translocation of an ICA512 cytosolic fragment couples granule exocytosis and insulin expression in beta-cells. *J. Cell Biol.* 167:1063-1074.
23. Ort T, *et al.* (2001) Dephosphorylation of beta2-syntrophin and Ca<sup>2+</sup>/mu-calpain-mediated cleavage of ICA512 upon stimulation of insulin secretion. *EMBO J.* 20:4013-4023.
24. Xu W, *et al.* (2007) Calpain-mediated mGluR1alpha truncation: a key step in excitotoxicity. *Neuron* 53:399-412.
25. Niswender CM, Conn PJ (2010) Metabotropic glutamate receptors: physiology, pharmacology, and disease. *Annu. Rev. Pharmacol. Toxicol.* 50:295-322.
26. Brown N, Crawford C (1993) Structural modifications associated with the change in Ca<sup>2+</sup> sensitivity on activation of m-calpain. *FEBS Lett.* 322:65-68.
27. Molinari M, Anagli J, Carafoli E (1994) Ca<sup>2+</sup>-activated neutral protease is active in the erythrocyte membrane in its noautolyzed 80-kDa form. *J. Biol. Chem.* 269:27992-27995.
28. Bi R, Rong Y, Bernard A, Khrestchatsky M, Baudry M (2000) Src-mediated tyrosine phosphorylation of NR2 subunits of N-methyl-D-aspartate receptors protects from calpain-mediated truncation of their C-terminal domains. *J. Biol. Chem.* 275:26477-26483.
29. Collingridge GL, Olsen RW, Peters J, Spedding M (2009) A nomenclature for ligand-gated ion channels. *Neuropharmacology* 56:2-5.
30. Simpkins KL, *et al.* (2003) Selective activation induced cleavage of the NR2B subunit by calpain. *J. Neurosci.* 23:11322-11331.
31. Steigerwald F, *et al.* (2000) C-Terminal truncation of NR2A subunits impairs synaptic but not extrasynaptic localization of NMDA receptors. *J. Neurosci.* 20:4573-4581.
32. Cho Y-J, Abe M, Kim SY, Sato Y (2005) Raf-1 is a binding partner of DSCR1. *Arch. Biochem. Biophys.* 439:121-128.
33. Catterall WA (2011) Voltage-gated calcium channels. *Cold Spring Harb. Perspect. Biol.* 3:a003947.
34. Hulme JT, *et al.* (2005) Sites of proteolytic processing and noncovalent association of the distal C-terminal domain of CaV1.1 channels in skeletal muscle. *Proc. Natl. Acad. Sci. USA* 102:5274-5279.
35. Hulme JT, Yarov-Yarovoy V, Lin TWC, Scheuer T, Catterall WA (2006) Autoinhibitory control of the CaV1.2 channel by its proteolytically processed distal C-terminal domain. *J. Physiol.* 576:87-102.
36. Gomez-Ospina N, Tsuruta F, Barreto-Chang O, Hu L, Dolmetsch R (2006) The C terminus of the L-type voltage-gated calcium channel Ca(V)1.2 encodes a transcription factor. *Cell* 127:591-606.
37. Valero JG, *et al.* (2012) μ-Calpain conversion of antiapoptotic Bfl-1 (BCL2A1) into a prodeath factor reveals two distinct alpha-helices inducing mitochondria-mediated apoptosis. *PLoS One* 7:e38620.

38. Wu Y, *et al.* (1997) Functional interactions between cytoplasmic domains of the skeletal muscle Ca<sup>2+</sup> release channel. *J. Biol. Chem.* 272:25051-25061.
39. Shoshan-Barmatz V, Weil S, Meyer H, Varsanyi M, Heilmeyer LM (1994) Endogenous, Ca(2+)-dependent cysteine-protease cleaves specifically the ryanodine receptor/Ca<sup>2+</sup> release channel in skeletal muscle. *J. Membr. Biol.* 142:281-288.
40. Rees DJG, Ades SE, Singer SJ, Hynes RO (1990) Sequence and domain structure of talin. *Nature* 347:685-689.
41. Bate N, *et al.* (2012) Talin contains a C-terminal calpain-2 cleavage site important in focal adhesion dynamics. *PLoS One* 7:e34461.
42. Gregoriou M, Willis AC, Pearson MA, Crawford C (1994) The calpain cleavage sites in the epidermal growth factor receptor kinase domain. *Eur. J. Biochem.* 223:455-464.
43. Mikawa K (1990) Studies on proteolysis of protein kinase C with calpain I and II. *Kobe J. Med. Sci.* 36:55-69.
44. Yoshida M, Suzuki A, Shimizu T, Ozawa E (1992) Proteinase-sensitive sites on isolated rabbit dystrophin. *J. Biochem.* 112:433-439.
45. Wei G, *et al.* (2012) Calpain-mediated degradation of myocyte enhancer factor 2D contributes to excitotoxicity by activation of extrasynaptic NMDA receptors. *J. Biol. Chem.* 287:5797-5805.
46. Patzke H, Tsai LH (2002) Calpain-mediated cleavage of the cyclin-dependent kinase-5 activator p39 to p29. *J. Biol. Chem.* 277:8054-8060.
47. Chua BT, Guo K, Li P (2000) Direct cleavage by the calcium-activated protease calpain can lead to inactivation of caspases. *J. Biol. Chem.* 275:5131-5135.
48. Baliova M, Jursky F (2005) Calpain sensitive regions in the N-terminal cytoplasmic domains of glycine transporters GlyT1A and GlyT1B. *Neurochem. Res.* 30:1093-1100.
49. Liu F, *et al.* (2005) Truncation and activation of calcineurin A by calpain I in Alzheimer disease brain. *J. Biol. Chem.* 280:37755-37762.
50. Chiocco MJ, *et al.* (2010) Fine mapping of calcineurin (PPP3CA) gene reveals novel alternative splicing patterns, association of 5'UTR trinucleotide repeat with addiction vulnerability, and differential isoform expression in Alzheimer's disease. *Subst. Use Misuse* 45:1809-1826.
51. Kishimoto A, *et al.* (1989) Limited proteolysis of protein kinase C subspecies by calcium-dependent neutral protease (calpain). *J. Biol. Chem.* 264:4088-4092.
52. Kang MY, *et al.* (2010) Receptor-independent cardiac protein kinase Calpha activation by calpain-mediated truncation of regulatory domains. *Circ. Res.* 107:903-912.
53. Perrin BJ, Amann KJ, Huttenlocher A (2006) Proteolysis of cortactin by calpain regulates membrane protrusion during cell migration. *Mol. Biol. Cell* 17:239-250.
54. Kimura Y, *et al.* (1998) The involvement of calpain-dependent proteolysis of the tumor suppressor NF2 (merlin) in schwannomas and meningiomas. *Nat. Med.* 4:915-922.
55. Zhang Z, Biesiadecki BJ, Jin JP (2006) Selective deletion of the NH<sub>2</sub>-terminal variable region of cardiac troponin T in ischemia reperfusion by myofibril-associated mu-calpain cleavage. *Biochemistry* 45:11681-11694.
56. Panigrahi AK, Zhang N, Mao Q, Pati D (2011) Calpain-1 cleaves Rad21 to promote sister chromatid separation. *Mol. Cell. Biol.* 31:4335-4347.
57. Rao H, Uhlmann F, Nasmyth K, Varshavsky A (2001) Degradation of a cohesin subunit by the N-end rule pathway is essential for chromosome stability. *Nature* 410:955-960.

58. Hauf S, Waizenegger IC, Peters J-M (2001) Cohesin cleavage by separase required for anaphase and cytokinesis in human cells. *Science* 293:1320-1323.
59. Varshavsky A (2008) Discovery of cellular regulation by protein degradation. *J. Biol. Chem.* 283:34469-34489.
60. Xu J, *et al.* (2009) Extrasynaptic NMDA receptors couple preferentially to excitotoxicity via calpain-mediated cleavage of STEP. *J Neurosci.* 29:9330-9343.
61. Fischer S, Vandekerckhove J, Ampe C, Traub P, Weber K (1986) Protein-chemical identification of the major cleavage sites of the Ca<sup>2+</sup> proteinase on murine vimentin, the mesenchymal intermediate filament protein. *Biol. Chem. Hoppe Seyler* 367:1147-1152.
62. Abe K, Takeichi M (2007) NMDA-receptor activation induces calpain-mediated beta-catenin cleavages for triggering gene expression. *Neuron* 53:387-397.
63. McGinnis KM, Whitton MM, Gnegy ME, Wang KK (1998) Calcium/calmodulin-dependent protein kinase IV is cleaved by caspase-3 and calpain in SH-SY5Y human neuroblastoma cells undergoing apoptosis. *J. Biol. Chem.* 273:19993-20000.
64. Kakkar R, Raju RV, Sharma RK (1998) In vitro generation of an active calmodulin-independent phosphodiesterase from brain calmodulin-dependent phosphodiesterase (PDE1A2) by m-calpain. *Arch. Biochem. Biophys.* 358:320-328.
65. Lee MS, *et al.* (2000) Neurotoxicity induces cleavage of p35 to p25 by calpain. *Nature* 405:360-364.
66. Lei HY, *et al.* (2015) Calpain cleaves most components in the multiple aminoacyl-tRNA synthetase complex and affects their functions. *J. Biol. Chem.* 290:26314-22627.
67. Zakharov VV, Mosevitsky MI (2007) M-calpain-mediated cleavage of GAP-43 near Ser41 is negatively regulated by protein kinase C, calmodulin and calpain-inhibiting fragment GAP-43-3. *J. Neurochem.* 101:1539-1551.
68. Zakharov VV, Bogdanova MN, Mosevitsky MI (2005) Specific proteolysis of neuronal protein GAP-43 by calpain: characterization, regulation, and physiological role. *Biochemistry (Russia)* 70:897-907.
69. Chan KT, Bennin DA, Huttenlocher A (2010) Regulation of adhesion dynamics by calpain-mediated proteolysis of focal adhesion kinase (FAK). *J. Biol. Chem.* 285:11418-11426.
70. Kerstein PC, Patel KM, Gomez TM (2017) Calpain-mediated proteolysis of talin and FAK regulates adhesion dynamics necessary for axon guidance. *J. Neurosci.* 37:1568-1580.
71. Togari A, Ichikawa S, Nagatsu T (1986) Activation of tyrosine hydroxylase by Ca<sup>2+</sup>-dependent neutral protease, calpain. *Biochem. Biophys. Res. Commun.* 134:749-754.
72. Kiuchi K, *et al.* (1991) Limited proteolysis of tyrosine hydroxylase by Ca(2+)-activated neutral protease (calpain). *Biochemistry* 30:10416-10419.
73. Ando Y, *et al.* (1989) Enhancement of calcium sensitivity of lipocortin I in phospholipid binding induced by limited proteolysis and phosphorylation at the amino terminus as analyzed by phospholipid affinity column chromatography. *J. Biol. Chem.* 264:6948-6955.
74. Williams SL, *et al.* (2010) A proinflammatory role for proteolytically cleaved annexin A1 in neutrophil transendothelial migration. *J. Immunol.* 185:3057-3063.
75. Emoto Y, Kasaki H, Manome Y, Kharbanda S, Kufe D (1996) Activation of protein kinase C-delta in human myeloid leukemia cells treated with 1-beta-D-arababinofuranosylcytosine. *Blood* 87:1990-1996.

76. Denning MF, Wang Y, Nickoloff B, Wrone-Smith T (1998) Protein kinase Cdelta is activated by caspase-dependent proteolysis during ultraviolet radiation-induced apoptosis of human keratinocytes. *J. Biol. Chem.* 273:29995-30002.
77. Leverrier S, Vallentin A, Joubert D (2002) Positive feedback of protein kinase C proteolytic activation during apoptosis. *Biochem. J.* 368:905-913.
78. Reyland ME (2007) Protein kinase Cdelta and apoptosis. *Biochem. Soc. Trans.* 35:1001-1004.
79. LaGory EL, Sitailo LA, Denning MF (2010) The protein kinase Cdelta catalytic fragment is critical for maintenance of the G2/M DNA damage checkpoint. *J. Biol. Chem.* 285:1879-1887.
80. Datta R, Kojima H, Yoshida K, Kufe D (1997) Caspase-3-mediated cleavage of protein kinase C-theta in induction of apoptosis. *J. Biol. Chem.* 272:20317-20320.
81. Wu YM, Huang CL, Kung HJ, Huang CYF (2001) Proteolytic activation of Etk/Bmx tyrosine kinase by caspases. *J. Biol. Chem.* 276:17672-17678.
82. Sabourin LA, Seale P, Wagner J, Rudnicki MA (2000) Caspase 3 cleavage of the Ste20-related kinase SLK releases and activates an apoptosis-inducing kinase domain and an actin-disassembling region. *Mol. Cell. Biol.* 20:684-696.
83. Arnold R, Liou J, Drexler HCA, Weiss A, Friedemann K (2001) Caspase-mediated cleavage of hematopoietic progenitor kinase 1 (HPK1) converts an activator of NF-kappaB into an inhibitor of NF-kappaB. *J. Biol. Chem.* 276:14675-14684.
84. Chen F, Arseven OK, Cryns VL (2004) Proteolysis of the mismatch repair protein MLH1 by caspase-3 promotes DNA damage-induced apoptosis. *J. Biol. Chem.* 279:27542-27548.
85. O'Donnell MA, *et al.* (2011) Caspase 8 inhibits programmed necrosis by processing CYLD. *Nat. Cell Biol.* 13:1437-1442.
86. Gervais JLM, Seth P, Zhang H (1998) Cleavage of CDK inhibitor p21<sup>Cip1/Waf1</sup> by caspases is an early event during DNA damage-induced apoptosis. *J. Biol. Chem.* 273:19207-11912.
87. Hirota J, Furuichi T, Mikoshiba K (1999) Inositol 1,4,5-trisphosphate receptor type 1 is a substrate for caspase-3 and is cleaved during apoptosis in a caspase-3-dependent manner. *J. Biol. Chem.* 274:34433-34437.
88. Takahashi A, *et al.* (1996) Cleavage of lamin A by Mch2-alpha but CPP32: multiple interleukin 1-beta-converting enzyme-related proteases with distinct substrate recognition properties are active in apoptosis. *Proc. Natl. Acad. Sci. USA* 93:8395-8400.
89. Choul-Li S, *et al.* (2010) Caspase cleavage of Ets-1 p51 generates fragments with transcriptional dominant-negative function. *Biochem. J.* 426:229-241.
90. Samedjima K, *et al.* (1999) Caspase-mediated cleavage of DNA topoisomerase I at unconventional sites during apoptosis. *J. Biol. Chem.* 274:4335-4340.
91. Okamoto S-I, *et al.* (2002) Dominant-interfering forms of MEF2 generated by caspase cleavage contribute to NMDA-induced neuronal apoptosis. *Proc. Natl. Acad. Sci. USA* 99:3974-3979.
92. Song Q, *et al.* (1996) DNA-dependent protein kinase catalytic subunit: a target for an ICE-like protease in apoptosis. *EMBO J.* 13:3238-3246.
93. Marambaud P, *et al.* (2002) A presenilin-1/gamma-secretase cleavage releases the E-cadherin intracellular domain and regulates disassembly of adherens junctions. *EMBO J.* 21:1948-1956.

94. Giaime E, *et al.* (2006) Caspase-3-derived C-terminal product of synphilin-1 displays antiapoptotic function via modulation of the p53-dependent cell death pathway. *J. Biol. Chem.* 281:11515-11522.
95. Sahara S, *et al.* (1999) Acinus is a caspase-3-activated protein required for apoptotic chromatin condensation. *Nature* 401:168-173.
96. Stegh AH, *et al.* (2000) Identification of the cytolinker plectin as a major early in vivo substrate for caspase 8 during CD95- and tumor necrosis factor receptor-mediated apoptosis *Mol. Cell. Biol.* 20:5665-5679.
97. Mazumder S, *et al.* (2002) Proteolytic cleavage of cyclin E leads to inactivation of associated kinase activity and amplification of apoptosis in hemetopoietic cells. *Mol. Cell. Biol.* 22:2398-2409.
98. Pászty K, *et al.* (2005) The caspase-3 cleavage product of the plasma membrane Ca<sup>2+</sup>-ATPase 4b is activated and appropriately targeted. *Biochem. J.* 391:687-692.
99. Tu S, Cerione RA (2001) Cdc42 is a substrate for caspase and influences Fas-induced apoptosis. *J. Biol. Chem.* 276:19656-19663.
100. Zhao X, *et al.* (2006) Caspase-3-dependent activation of calcium-independent phospholipase A2 enhances cell migration in non-apoptotic ovarian cancer cells. *J. Biol. Chem.* 281:29357-29368.
101. Kim JM, *et al.* (2018) Formyl-methionine as an N-degron of a eukaryotic N-end rule pathway. *Science* 362:eaat0174.
102. Piatkov KI, Vu TM, Hwang CS, Varshavsky A (2015) Formyl-methionine as a degradation signal at the N-termini of bacterial proteins. *Microbial Cell* 2:376-393.
103. Graciet E, *et al.* (2006) Aminoacyl-transferases and the N-end rule pathway in a human pathogen. *Proc. Natl. Acad. Sci. USA* 103:3078-3083.
104. Chen SJ, Wu X, Wadas B, Oh J-H, Varshavsky A (2017) An N-end rule pathway that recognizes proline and destroys gluconeogenic enzymes. *Science* 355:366.
105. Dong C, *et al.* (2018) Molecular basis of GID-mediated recognition of degrons for the Pro/N-end rule pathway. *Nat. Chem. Biol.* 14:466-473.
106. Dougan DA, Varshavsky A (2018) Understanding the Pro/N-end rule pathway. *Nat. Chem. Biol.* 14:415-416.
107. Hwang CS, Shemorry A, Varshavsky A (2010) N-terminal acetylation of cellular proteins creates specific degradation signals. *Science* 327:973-977.
108. Shemorry A, Hwang CS, Varshavsky A (2013) Control of protein quality and stoichiometries by N-terminal acetylation and the N-end rule pathway. *Mol. Cell* 50:540-551.
109. Kim HK, *et al.* (2014) The N-terminal methionine of cellular proteins as a degradation signal. *Cell* 156:158-169.
110. Park SE, *et al.* (2015) Control of mammalian G protein signaling by N-terminal acetylation and the N-end rule pathway. *Science* 347:1249-1252.
111. Varshavsky A (2011) The N-end rule pathway and regulation by proteolysis. *Prot. Sci.* 20:1298-1345.
112. Tasaki TS, Sriram SM, Park KS, Kwon YT (2012) The N-end rule pathway. *Annu. Rev. Biochem.* 81:261-289.
113. Koren I, *et al.* (2018) The eukaryotic proteome is shaped by E3 ubiquitin ligases targeting C-terminal degrons. *Cell* 173:1622-1635.e1614.

114. Lin HC, *et al.* (2018) C-terminal end-directed protein elimination by CRL2 ubiquitin ligases. *Mol. Cell* 70:602-613.e603.
115. Chatr-Aryamontri A, van der Sloot A, Tyers M (2018) At long last, a C-terminal bookend for the ubiquitin code. *Mol. Cell* 70:568-571.
